# Supplementary material for: Repercussion of COVID-19 Pandemic on Brazilians’ Quality of Life: A Nationwide Cross-Sectional Study
Source: PubMed Central journal article supplement (PMC7698925; doi:10.3390/ijerph17228554), 2020-11-18
Supplement: ijerph-17-08554-s001.pdf [file ijerph-17-08554-s001.pdf]

## Supplementary Material

**Table S1.** Positive COVID-19 by quality of life (QoL) scores and socioeconomic and demographic variables of Brazilian individuals during the pandemic period.

|                                                                                           | Positive COVID-19          |                            | <i>P</i>  |
|-------------------------------------------------------------------------------------------|----------------------------|----------------------------|-----------|
|                                                                                           | No ( <i>n</i> = 1800)      | Yes ( <i>n</i> = 50)       |           |
| <b>Gender (freq.; %)</b>                                                                  |                            |                            |           |
| Female <sup>a</sup>                                                                       | 1305 (97.2%)               | 38 (2.8%)                  | 0.634 **  |
| Male <sup>a</sup>                                                                         | 495 (97.6%)                | 12 (2.4%)                  |           |
| <b>Age (freq.; %)</b>                                                                     |                            |                            |           |
| < 40 y/o <sup>a</sup>                                                                     | 902 (97.2%)                | 26 (2.8%)                  | 0.886 **  |
| ≥ 40 y/o <sup>a</sup>                                                                     | 893 (97.4%)                | 24 (2.6%)                  |           |
| <b>Marital status (freq.; %)</b>                                                          |                            |                            |           |
| Without partner <sup>a</sup>                                                              | 909 (97.6%)                | 22 (2.4%)                  | 0.392 **  |
| With partner <sup>a</sup>                                                                 | 889 (96.9%)                | 28 (3.1%)                  |           |
| <b>Ethnicity (freq.; %)</b>                                                               |                            |                            |           |
| White <sup>a</sup>                                                                        | 1065 (97.7%)               | 25 (2.3%)                  | 0.122 *** |
| Brown <sup>a</sup>                                                                        | 492 (95.7%)                | 22 (4.3%)                  |           |
| Black <sup>a</sup>                                                                        | 142 (98.6%)                | 2 (1.4%)                   |           |
| Yellow/Indigenous <sup>a</sup>                                                            | 44 (100%)                  | 0 (0%)                     |           |
| <b>Children living at home (freq.; %)</b>                                                 |                            |                            |           |
| No <sup>a</sup>                                                                           | 943 (97.7%)                | 22 (2.3%)                  | 0.185 **  |
| Yes <sup>a</sup>                                                                          | 820 (96.7%)                | 28 (3.3%)                  |           |
| <b>Place of residency (freq.; %)</b>                                                      |                            |                            |           |
| Urban area <sup>a</sup>                                                                   | 1714 (97.3%)               | 48 (2.7%)                  | 0.890 **  |
| Rural area <sup>a</sup>                                                                   | 79 (97.5%)                 | 2 (2.5%)                   |           |
| <b>Educational level (freq.; %)</b>                                                       |                            |                            |           |
| High school <sup>a</sup>                                                                  | 166 (98.2%)                | 3 (1.8%)                   | 0.005 **  |
| Higher Education <sup>a</sup>                                                             | 679 (98.7%)                | 9 (1.3%)                   |           |
| Postgraduate <sup>b</sup>                                                                 | 951 (96.2%)                | 38 (3.8%)                  |           |
| <b>Professional occupation (freq.; %)</b>                                                 |                            |                            |           |
| Unemployed <sup>a</sup>                                                                   | 126 (97.7%)                | 3 (2.3%)                   | 0.213 **  |
| Student or intern <sup>a</sup>                                                            | 250 (97.7%)                | 6 (2.3%)                   |           |
| Government employee <sup>a</sup>                                                          | 537 (96.1%)                | 22 (3.9%)                  |           |
| Others <sup>a</sup>                                                                       | 872 (97.9%)                | 19 (2.1%)                  |           |
| <b>Social isolation (freq.; %)</b>                                                        |                            |                            |           |
| No social distancing <sup>a</sup>                                                         | 33 (100%)                  | 0 (0%)                     | 0.715 *** |
| Out only for essential purchase, working and visiting family <sup>a</sup>                 | 228 (96.2%)                | 9 (3.8%)                   |           |
| Goes out only for essential purchase, but some family members go out to work <sup>a</sup> | 675 (97.3%)                | 19 (2.7%)                  |           |
| Goes out only for essential purchase <sup>a</sup>                                         | 736 (97.5%)                | 19 (2.5%)                  |           |
| Everyone stays at home and purchases are made online <sup>a</sup>                         | 122 (97.6%)                | 3 (2.4%)                   |           |
| <b>QoL Scores (mean; SD)</b>                                                              |                            |                            |           |
| Psychological                                                                             | 15.58 (3.80) <sup>A</sup>  | 13.54 (4.13) <sup>B</sup>  | 0.000     |
| Social                                                                                    | 14.83 (3.40) <sup>A</sup>  | 13.36 (3.19) <sup>B</sup>  | 0.003     |
| Physical                                                                                  | 17.66 (2.95) <sup>A</sup>  | 16.00 (3.08) <sup>B</sup>  | 0.000     |
| Economic                                                                                  | 14.66 (4.96) <sup>A</sup>  | 13.78 (5.00) <sup>B</sup>  | 0.215     |
| TOTAL                                                                                     | 62.73 (11.50) <sup>A</sup> | 56.68 (11.65) <sup>B</sup> | 0.001     |

Note: Some variables have a sum less than  $n = 1859$ , as some individuals did not inform their data; \* T-Student test; \*\* Pearson chi-squared test; \*\*\* Monte Carlo based chi-squared test; Different small letters (a, b, c) on the same column represent statistical differences ( $p < 0.05$ ); Different capital letters (A, B) on the same line represent statistical differences ( $p < 0.05$ ).
